# Supplementary material for: Study on Bioresponsive Gelatin-Hyaluronic Acid-Genipin Hydrogel for High Cell-Density 3D Bioprinting
Source: MDPI journal article supplement (doi:10.3390/gels9080601), 2023-07-26
Supplement: s1 [file s1]

# Study on Bioresponsive Gelatin-Hyaluronic Acid-Genipin Hydrogel for High Cell-Density 3D Bioprinting

Mst Rita Khatun <sup>1</sup>, Amitava Bhattacharyya <sup>1,2,3</sup>, Maral Gunbayer <sup>1</sup>, Minsik Jung <sup>1</sup> and Insup Noh <sup>1,3,\*</sup>

<sup>1</sup> Department of Chemical and Biomolecular Engineering, Seoul National University of Science and Technology, Seoul 01811, Republic of Korea;  
mstrita931215@seoultech.ac.kr (M.R.K.); amitbha1912@seoultech.ac.kr (A.B.);  
marlagunbayer@naver.com (M.G.); minsik0217@naver.com (M.J.)

<sup>2</sup> Functional, Innovative and Smart Textiles, PSG Institute of Advanced Studies,  
Coimbatore 641004, India

<sup>3</sup> Convergence Institute of Biomedical Engineering and Biomaterials, Seoul National University of Science and Technology, Seoul 01811, Republic of Korea

\* Correspondence: insup@seoultech.ac.kr

Scheduled to be submitted to *gels*.

July 2023

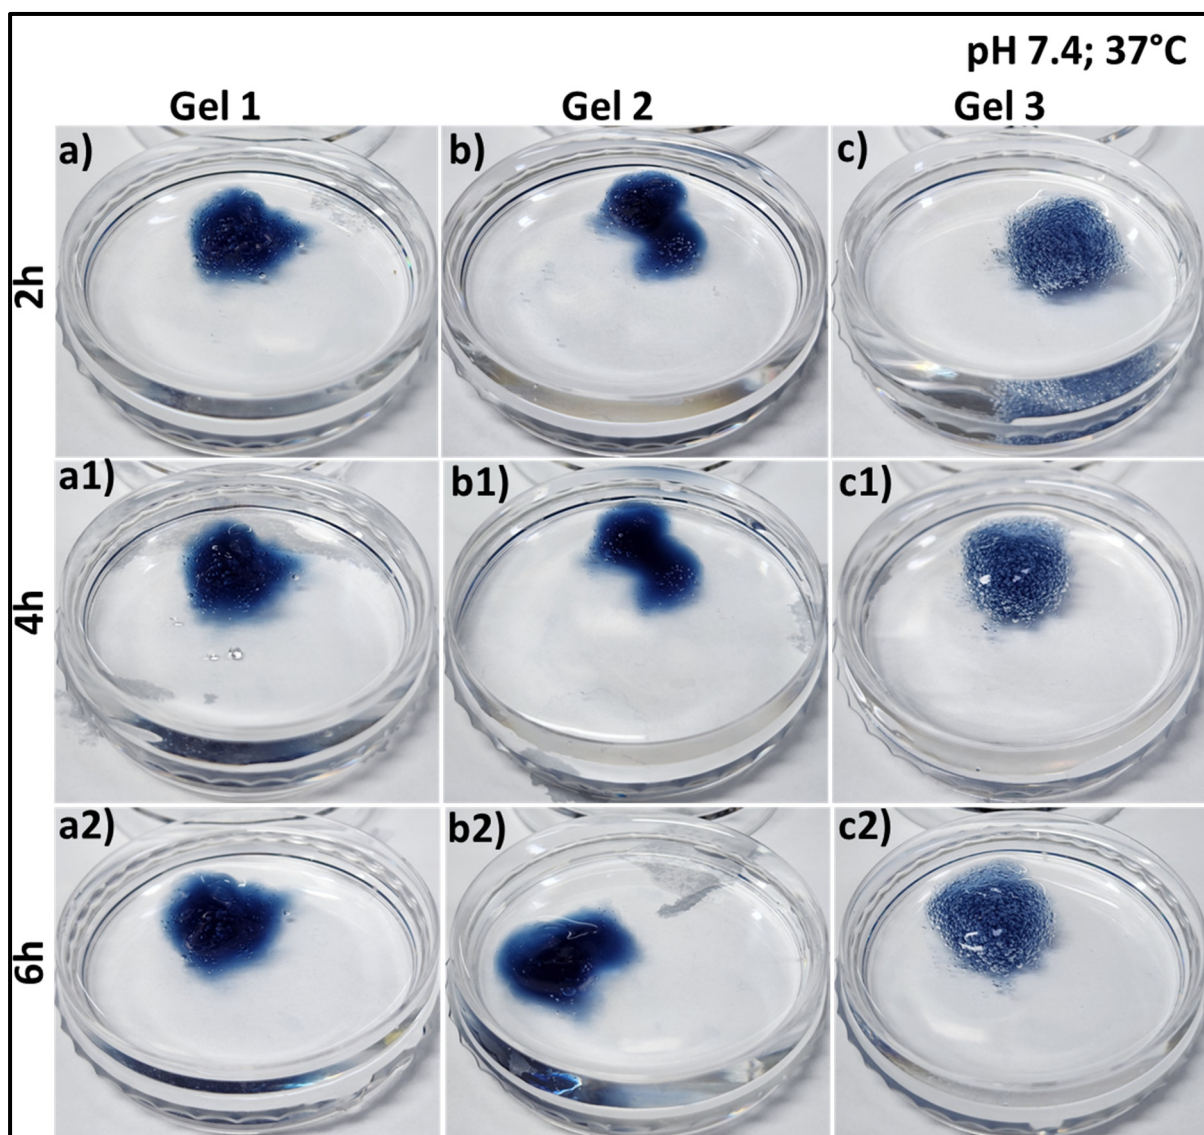

Supporting Figure S1. Swelling of different gelatin-HA hydrogel at 37°C in pH 7.4 phosphate buffer solution (PBS).

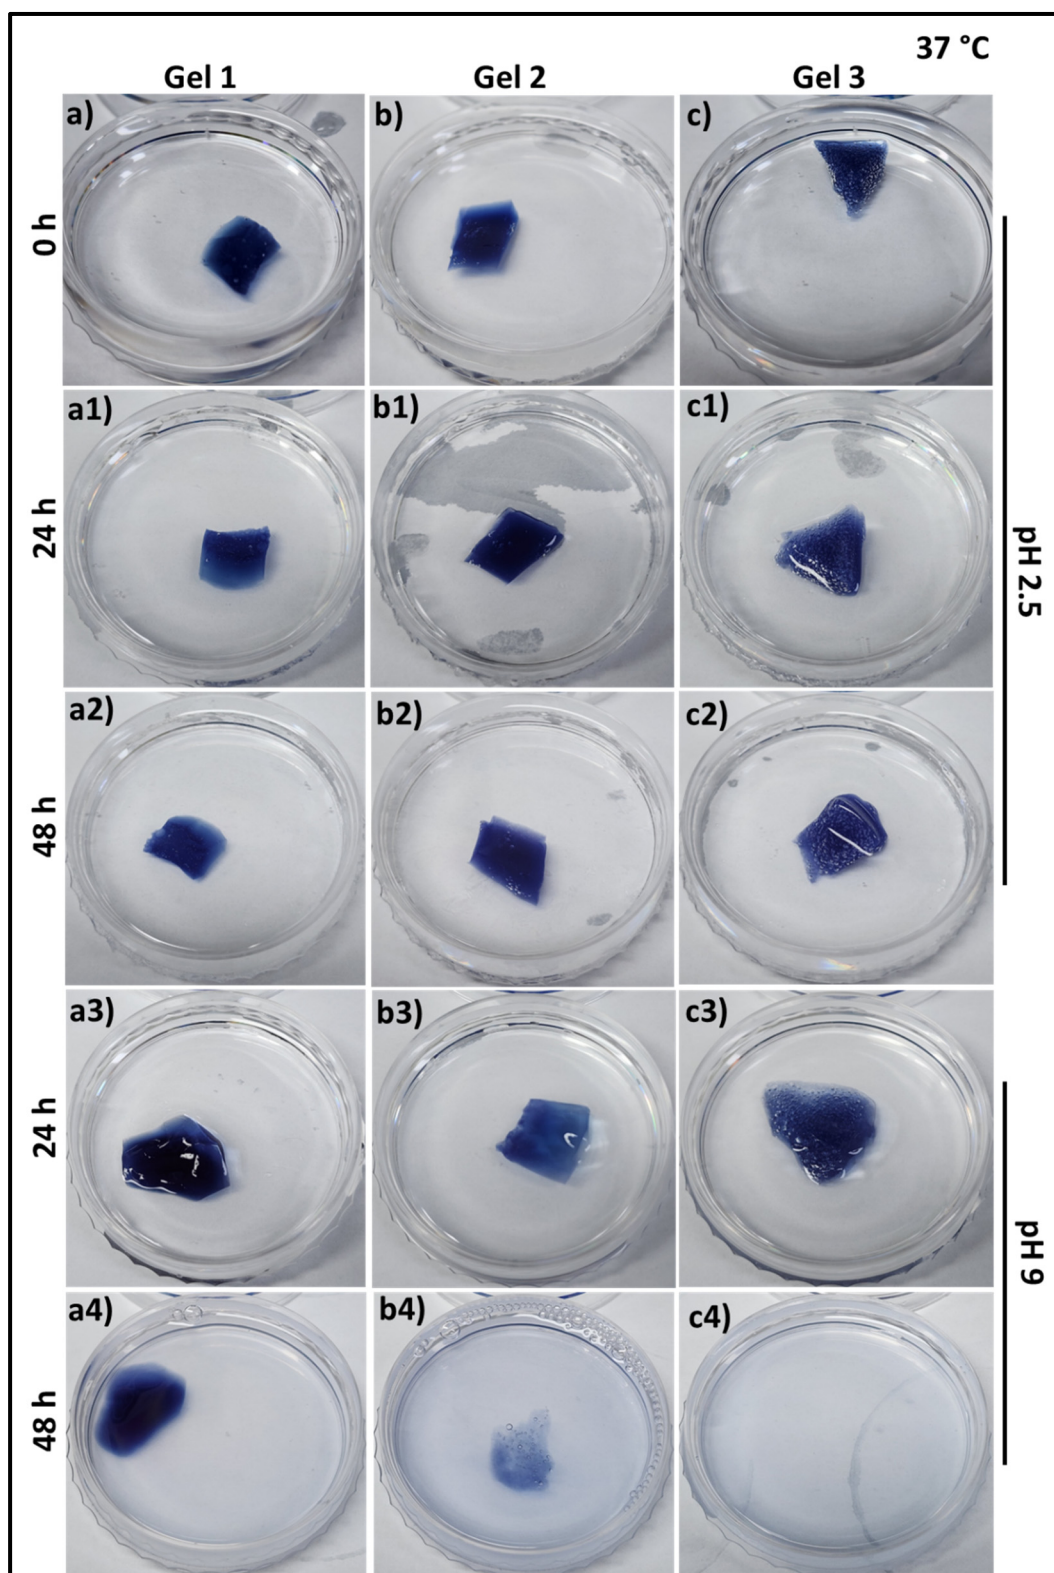

Supporting Figure S2. Degradation study of different gelatin-HA hydrogels at pH 2.5 and pH 9 PBS in 37°C for 48 hours.



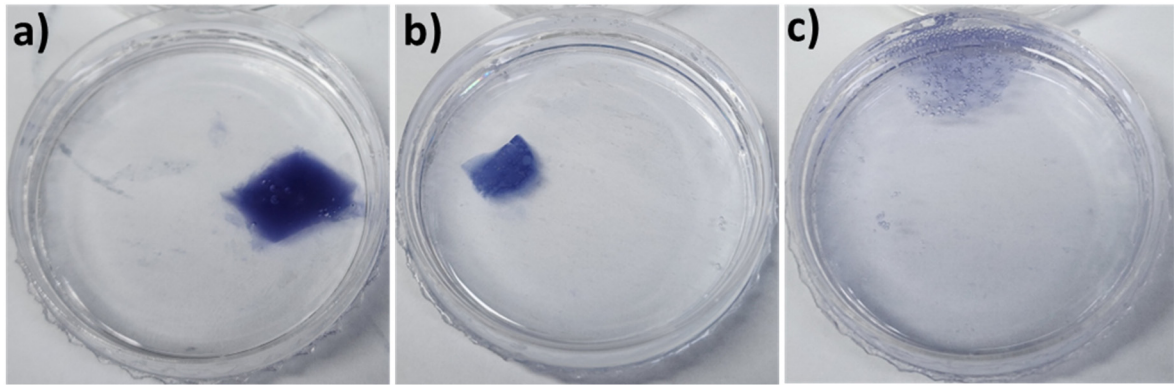

Supporting Figure S3. Degradation study of different gelatin-HA hydrogels at 37°C and pH 2.5 in PBS after 5 days, where (a) Gel 1; (b) Gel 2; (c) Gel 3.

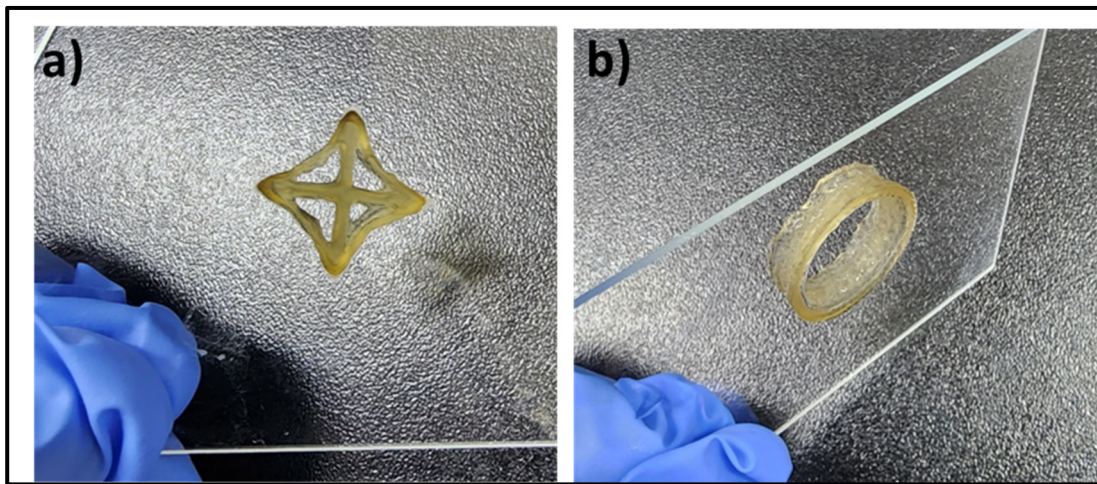

Supporting Figure S4. Adhesiveness test of the printed gelatin-HA gel scaffolds by inverting the glass substrate, where (a) star, (b) tube.
